# Supplementary material for: A putative origin of the insect chemosensory receptor superfamily in the last common eukaryotic ancestor
Source: eLife. 2020 Dec 4;9:e62507. doi: 10.7554/eLife.62507 (PMC7746228; doi:10.7554/eLife.62507)
Supplement: Supplementary file 7. — Results from trRosetta and RaptorX analyses with the indicated protein queries. Multiple sequence alignments (MSAs) were built automatically with the indicated numbers of sequences. In several cases, insufficient sequences were aligned, leading to inadequate data for prediction of inter-residue contacts. For these proteins, the ‘estimated TM-scores’ of the trRosetta models are commensurately low (scores < 0.17 are likely to reflect spurious protein structural models [Yang et al., 2020; Zhang and Skolnick, 2004]) and further analysis was not pursued (as indicated by the grey cells). For the other proteins, the top hit and corresponding Z-score from Dali searches of the full Protein Data Bank (PDB) with the top-predicted model are shown. The top model for RaptorX output was defined as that with the lowest ‘estimated RMSD’ (root mean-squared deviation, i.e., the estimated average distance deviation (in Å) of the model from the real structure). For almost all models, individual chains of the AbakORCO homotetramer (A-D) were retrieved as top hits, with a much higher Z-score than the next, non-ORCO hit. TtraGRL4 and TtraGRL5 models were built using MSAs containing only a subset of plant DUF3537 proteins. Although the trRosetta estimated TM-scores were above the threshold (i.e.,>0.17), the retrieved Dali top hits did not have stand-out Z-scores and are likely to be spurious (DIABLO is a HECT-type E3 ligase and PLECTIN is a cytoskeletal protein); here the Z-score of the AbakORCO hit is also given. Dali searches with several of the RaptorX models of the plant proteins identified de novo designed (i.e., artificial) proteins or completely unrelated molecules as the top hit, but AbakORCO was usually also retrieved, with a lower Z-score, as indicated. Full output of trRosetta and RaptorX analyses and Dali searches are provided in the Dryad repository (doi:10.5061/dryad.s7h44j15f). [file elife-62507-supp7.xlsx]

## Sheet: Supp file 7
Supplementary file 7. Ab initio protein modelling of GRLs and DUF3537 proteins.
	trRosetta							RaptorX
Protein query	# sequences in MSA	Estimated TM-score	Dali top-hit (full PDB)	Z-score				# sequences in MSA (max. 5001)	Model score (estimated RMSD, A)	Model no.	Dali top-hit (full PDB)	Z-score
AbakORCO	4209	0.641	ORCO-A	32.8				5001	3.0124	1	ORCO-D	35.7
DmelGR64a	1196	0.539	ORCO-D	26.2				5001	4.8449	1	ORCO-B	30
DmelOR22a	1962	0.669	ORCO-C	30				5001	1.6901	1	ORCO-B	37.1
SkowGRL1	2776	0.547	ORCO-A	30.9				5001	4.6519	2	ORCO-B	35
SpurGRL1	646	0.495	ORCO-D	24.6				5001	4.7884	2	ORCO-D	29.7
NvecGRL1	894	0.361	ORCO-C	18.1				5001	5.2783	2	ORCO-C	30.4
TadhGRL1	1598	0.485	ORCO-A	19.7				5001	2.4283	2	ORCO-D	36.9
SpunGRL1	1	0.111						2
SpalGRL1	2	0.111						2
PfunGRL1	1	0.1						2
TtraGRL1	6248	0.296	ORCO-B	21.7				1446	13.566	1	ORCO-A	18.2
TtraGRL2	2603	0.458	ORCO-A	24.3				1425	16.451	1	ORCO-D	21.7
TtraGRL3	1239	0.48	ORCO-B	24.6				3
TtraGRL4	127	0.262	DIABLO (6JX6-D)	14.8	ORCO-A	7.7		11
TtraGRL5	222	0.242	PLECTIN (5J1G-A)	11.5	ORCO-B	4.9		7
TtraGRL6	312	0.167						9
VbraGRL1	2628	0.461	ORCO-A	28.7				5001	5.2001	1	ORCO-B	28
VbraGRL2	3010	0.504	ORCO-A	25.6				736	6.044	2	ORCO-B	21.6
VbraGRL3	3	0.1						10
VbraGRL4	2	0.1						9
VbraGRL5	2	0.1						9
VbraGRL6	3	0.1						12
CpriGRL1	171	0.106						767	12.326	1	INTERFERON-INDUCED GTP-BINDING PROTEIN MX2 (4X0R-A)	8.1	ORCO-A	3.5
MpusGRL1	1	0.1						655	12.263	1	TNFR (4YN0-B)	9.6
AthaAT2G21080	289	0.277	ORCO-B	17.1				756	5.2268	1	ORCO-B	15.7
AthaAT4G03820	311	0.238	ORCO-C	11.2				683	6.2232	1	REACTION CENTER MAQUETTE (5VJS-A) (de novo designed protein)	11.7	ORCO-A	9.6
AthaAT4G22270	312	0.218	ORCO-C	13.4				738	6.5151	1	TMH4C4 (6M6Z-B) (de novo designed protein)	14	ORCO-D	9.7
AthaAT1G50630	309	0.238	ORCO-B	16.7				688	6.486	1	TMH4C4 (6M6Z-B) (de novo designed protein)	11.5	ORCO-C	11
AthaAT1G67570	291	0.262	ORCO-C	17.3				712	7.36	1	ORCO-B	16
AthaAT3G20300	311	0.283	ORCO-B	18				730	7.5538	1	TMH4C4 (6M6Z-B) (de novo designed protein)	11.5	ORCO-D	9.5
